# Supplementary material
Source: HighWire-hosted journal article supplement (https://www.jneurosci.org/highwire/filestream/599310/field_highwire_adjunct_files/6/Supplemental_Table_3.pdf)
Supplement: Supplemental_Table_3.pdf [file Supplemental_Table_3.pdf]

**Supplemental Table 3. Regions of structural cortical network (sparsity = 13%) in the AD subjects and their statistical properties**

| Regions | Class       | $b_i$ | $k_i$ |
|---------|-------------|-------|-------|
| LOFG.R  | Paralimbic  | 3.39  | 13    |
| CING.R  | Paralimbic  | 3.00  | 18    |
| LING.L  | Association | 2.87  | 13    |
| LOTG.L  | Association | 2.33  | 8     |
| LING.R  | Association | 2.31  | 10    |
| MTG.L   | Association | 2.25  | 5     |
| SOG.R   | Association | 2.06  | 9     |
| MOFG.L  | Association | 1.94  | 5     |
| MOFG.R  | Association | 1.91  | 12    |
| STG.L   | Primary     | 1.81  | 7     |
| UNC.L   | Association | 1.81  | 7     |
| SMG.L   | Paralimbic  | 1.57  | 6     |
| IFG.L   | Paralimbic  | 1.55  | 9     |
| MFG.R   | Association | 1.52  | 12    |
| PCU.L   | Association | 1.45  | 12    |
| SMG.R   | Association | 1.43  | 8     |
| OP.L    | Primary     | 1.39  | 7     |
| SFG.R   | Association | 1.38  | 11    |
| PoCG.R  | Primary     | 1.24  | 12    |
| SFG.L   | Association | 1.18  | 11    |
| CUN.L   | Association | 1.05  | 9     |
| OP.R    | Primary     | 1.00  | 12    |
| CING.L  | Paralimbic  | 0.99  | 14    |
| IFG.R   | Association | 0.92  | 7     |
| PrCG.R  | Primary     | 0.91  | 11    |
| ITG.L   | Association | 0.89  | 8     |
| PoCG.L  | Primary     | 0.88  | 5     |
| IOG.R   | Association | 0.87  | 3     |
| MTG.R   | Association | 0.83  | 5     |

|        |             |      |    |
|--------|-------------|------|----|
| INS.L  | Paralimbic  | 0.81 | 2  |
| MOTG.L | Association | 0.80 | 8  |
| SOG.L  | Association | 0.70 | 9  |
| PrCG.L | Primary     | 0.69 | 9  |
| ITG.R  | Association | 0.64 | 11 |
| LOFG.L | Paralimbic  | 0.58 | 2  |
| MOG.R  | Association | 0.49 | 2  |
| PHG.L  | Paralimbic  | 0.49 | 8  |
| UNC.R  | Paralimbic  | 0.44 | 5  |
| MdFG.L | Association | 0.37 | 7  |
| MdFG.R | Association | 0.26 | 4  |
| MFG.L  | Association | 0.21 | 4  |
| MOTG.R | Association | 0.17 | 5  |
| PHG.R  | Paralimbic  | 0.16 | 5  |
| INS.R  | Paralimbic  | 0.13 | 2  |
| ANG.R  | Association | 0.10 | 2  |
| SPL.R  | Association | 0.08 | 8  |
| STG.R  | Association | 0.06 | 2  |
| IOG.L  | Association | 0.06 | 3  |
| SPL.L  | Association | 0.03 | 2  |
| LOTG.R | Association | 0.02 | 3  |
| ANG.L  | Association | 0.00 | 1  |
| PCU.R  | Association | 0.00 | 2  |
| MOG.L  | Association | 0.00 | 1  |
| CUN.R  | Association | 0.00 | 4  |

All of regions in the structural cortical network in the AD group, were listed in a descending order of the normalized betweenness,  $b_i$ . The regions were classified as Primary, Associations and Paralimbic as described by Mesulam (1998).  $k_i$  denotes the degree of region  $i$ . For the abbreviation of regions, see Supplemental Table 1.
